# Supplementary material for: The Effects of Orthoptic Therapy on the Surgical Outcome in Children with Intermittent Exotropia: Randomised Controlled Clinical Trial
Source: MDPI journal article supplement (doi:10.3390/jcm12041283), 2023-02-06
Supplement: s1 [file s1]

**Supplementary Table S1.** The criteria for intermittent exotropia.

| The criteria for intermittent exotropia |                                                                                                                                                         |
|-----------------------------------------|---------------------------------------------------------------------------------------------------------------------------------------------------------|
| 1                                       | Intermittent OR constant exotropia at distance and either intermittent exotropia or exophoria at near                                                   |
| 2                                       | Exo-deviation $\geq 20$ PD at near or at distance                                                                                                       |
| 3                                       | Evidence of progressive loss of stereoacuity                                                                                                            |
| 4                                       | Exotropia present greater than or equal to 50% of waking hours, or weaker control of exodeviation (fusional control score $\geq 3$ at near or distance) |
| 5                                       | The appearance of the exotropia is causing psychological problems of patients and parents                                                               |
| 6                                       | Best corrected visual acuity (BCVA) in the worse eye is 0.1 logMAR or better and children with amblyopia received a period of treatment                 |
| 7                                       | Wear appropriate refractive correction spectacles for at least 1 month before surgery                                                                   |
| 8                                       | No atropine was used within the previous month                                                                                                          |

PD: prism diopter.
